# Supplementary material for: High Cell Density Cultivation Process for the Expression of Botulinum Neurotoxin a Receptor Binding Domain
Source: MDPI journal article supplement (doi:10.3390/toxins14040281), 2022-04-14
Supplement: s1 [file s1]

## Supplementary Materials: High Cell Density Cultivation Process for the Expression of Botulinum Neurotoxin A Receptor Binding Domain

Alon Ben David, Yoel Papir, Ophir Hazan, Moses Redelman, Eran Diamant, Ada Barnea, Amram Torgeman and Ran Zichel

**Table S1.** Process data of batch fermentation for Hc fragment expression in 4-L fermentor applying shake flasks growth conditions. Culture was grown in TB media at 37 °C.

| EFT (hr) | O.D.600nm | pH   | DO (%) | Impeller speed (rpm) | Air flow (L/min) | Volumetric Hc fragment expression yield (mg/L) | Specific Hc fragment expression yield (mg/L·O.D) |
|----------|-----------|------|--------|----------------------|------------------|------------------------------------------------|--------------------------------------------------|
| 0        | 0.05      | 7.25 | 88     | 150                  | 2                |                                                |                                                  |
| 2        | 0.33      | 7.21 | 31     | 150                  | 2                | 0.5                                            | 1.40                                             |
| 3        | 0.5       | 7.18 | 25     | 227                  | 2                | 0.7                                            | 1.47                                             |
| 4        | 1.3       | 7.14 | 24     | 345                  | 4                | 0.5                                            | 0.40                                             |
| 5        | 3.2       | 7.12 | 25     | 525                  | 5                | 14.2                                           | 4.43                                             |
| 6        | 7.3       | 7.3  | 24     | 847                  | 6                | 55.4                                           | 7.59                                             |
| 7        | 10.2      | 7.68 | 26     | 812                  | 7                | 75.8                                           | 7.43                                             |
| 8        | 10        | 7.78 | 26     | 721                  | 7                | 109.3                                          | 10.93                                            |
| 9        | 11        | 7.91 | 25.3   | 710                  | 7                | 123.1                                          | 11.19                                            |
| 12       | 11.5      | 8.29 | 25.3   | 197                  | 7                | 115.6                                          | 10.05                                            |

**Table S2.** Process data for fed-batch fermentation for Hc fragment expression.

| EFT (hr) | O.D.600nm | pH   | DO (%) | Impeller speed (rpm) | Air flow (L/min) | Volumetric Hc fragment expression yield (mg/L) | Specific Hc fragment expression yield (mg/L·O.D) | Supplements* |
|----------|-----------|------|--------|----------------------|------------------|------------------------------------------------|--------------------------------------------------|--------------|
| 0        | 0.035     | 6.96 | 95     | 150                  | 2                |                                                |                                                  |              |
| 2        | 0.15      | 7    | 43     | 150                  | 2                | 0.6                                            | 3.8                                              |              |
| 3        | 0.455     | 6.96 | 23.1   | 206                  | 2                | 2.4                                            | 5.4                                              |              |
| 4        | 1.1       | 6.93 | 23     | 330                  | 3                | 2.3                                            | 2.1                                              |              |
| 5        | 2.6       | 7    | 22     | 490                  | 3                | 19                                             | 7.4                                              |              |
| 6        | 6.3       | 7.23 | 22     | 810                  | 4                | 69                                             | 10.9                                             | M            |
| 7        | 14.6      | 7.65 | 1.9    | 1000                 | 10               | 118                                            | 8.1                                              | M,P,G,T,N    |
| 8        | 23.2      | 7    | 0      | 1000                 | 10               | 236                                            | 10.2                                             | M,P,N        |
| 9        | 27.2      | 7    | 0.3    | 1000                 | 10               | 540                                            | 19.9                                             | G            |
| **12     | 31        | 7    | 25     | 990                  | 10               | 938                                            | 30.3                                             |              |
| 26       | 40.5      | 8.25 | 20     | 340                  | 5                | 1093                                           | 27.0                                             | G            |
| 28       | 36        | 7.6  | 20     | 494                  | 5                | 898                                            | 24.9                                             |              |
| 30       | 35.5      | 7.45 | 20.2   | 470                  | 5                | 956                                            | 26.9                                             |              |

\*Supplements: M - MgSO<sub>4</sub>, P - sodium phosphate, G - glycerol, T - trace elements, N - tryptone and yeast extract concentrate. \*\* temperature was set to 18°C.

**Table S3.** Process data for high cell density cultivation for Hc fragment expression.

| EFT (hr) | O.D.600nm | pH   | DO (%) | Impeller speed (rpm) | Air flow (L/min) | Volumetric Hc fragment expression yield (mg/L) | Specific Hc fragment expression yield (mg/L·O.D) | Supplements*                 |
|----------|-----------|------|--------|----------------------|------------------|------------------------------------------------|--------------------------------------------------|------------------------------|
| 0        | 0.1       | 6.83 | 89     | 200                  | 2                |                                                |                                                  |                              |
| 3        | 0.6       | 6.84 | 20     | 229                  | 2                |                                                |                                                  |                              |
| 5        | 1.2       | 6.82 | 20     | 284                  | 2                |                                                |                                                  |                              |
| 7        | 2.8       | 6.8  | 19     | 377                  | 2                | 11                                             | 3.8                                              |                              |
| 9        | 5.5       | 6.8  | 17.5   | 522                  | 2                | 33                                             | 6.1                                              |                              |
| 11       | 12.2      | 6.8  | 18.2   | 751                  | 5                | 47                                             | 3.8                                              |                              |
| **12.5   | 28        | 6.8  | 20     | 1000                 | 10               | 94                                             | 3.3                                              | G,M,T                        |
| ***13.5  | 29.2      | 6.8  | 20     | 420                  | 10               | 115                                            | 3.9                                              |                              |
| 23       | 65.5      | 6.8  | 19.9   | 660                  | 10               | 324                                            | 4.9                                              |                              |
| 24.75    | 82        | 6.8  | 18.7   | 768                  | 7                | 354                                            | 4.3                                              | G,M,T,P                      |
| 26       | 88        | 6.8  | 20     | 876                  | 8                |                                                |                                                  |                              |
| 27       | 106       | 6.8  | 19.7   | 922                  | 10               | 470                                            | 4.4                                              | G,M,T                        |
| 28       | 116       | 6.8  | 18.3   | 927                  | 10               |                                                |                                                  |                              |
| 29       | 118       | 6.8  | 18     | 1000                 | 10               | 559                                            | 4.7                                              |                              |
| 30       | 126       | 6.8  | 23.2   | 909                  | 10               |                                                |                                                  |                              |
| 31       | 138       | 6.8  | 20.6   | 861                  | 10               | 698                                            | 5.1                                              | Continuous feeding of G, M,T |
| 33       | 160       | 6.8  | 20.5   | 894                  | 10               | 811                                            | 5.1                                              |                              |
| 35       | 170       | 6.8  | 20     | 926                  | 10               | 1028                                           | 6.0                                              |                              |
| 38.5     | 189       | 6.8  | 18.7   | 1000                 | 10               | 1147                                           | 6.1                                              |                              |
| 47       | 260       | 6.8  | 12     | 1000                 | 10               | 1823                                           | 7.0                                              | G,M,T,N                      |
| 50       | 250       | 8    | 20     | 1000                 | 10               | 2065                                           | 8.3                                              |                              |

\*Supplements: M - MgSO<sub>4</sub>, P - sodium phosphate, G - glycerol, T - trace elements, N - tryptone and yeast extract concentrate. \*\*temperature was set to 28°C. \*\*\*temperature was set to 18°C.
